# Supplementary material for: Analysis of the Origin of Emiratis as Inferred from a Family Study Based on HLA-A, -C, -B, -DRB1, and -DQB1 Genes
Source: MDPI journal article supplement (doi:10.3390/genes14061159), 2023-05-26
Supplement: s1 [file s1]

Table S1 Reference populations used in the present work

| Nº | Populations           | Size  | References*   | Nº | Populations        | Size | References* |
|----|-----------------------|-------|---------------|----|--------------------|------|-------------|
| 1  | <b>Emiratis-a</b>     | 200   | Present study | 44 | Greece-A           | 96   | [15]        |
| 2  | Algeria               | 102   | [39]          | 45 | Greece-B           | 101  | [15]        |
| 3  | Algeria-A             | 132   | [22]          | 46 | Jordan-A           | 1254 | [20]        |
| 4  | Algeria-B             | 97    | [1]           | 47 | Syria              | 200  | [21]        |
| 5  | Greece-D              | 242   | [1]           | 48 | Syria-A            | 225  | [30]        |
| 6  | Tunisia-Gabesia       | 77    | [31]          | 49 | Lebanon            | 95   | [11]        |
| 7  | Tunisia-Ghannouchia   | 82    | [9]           | 50 | Lebanon-A          | 1123 | [19]        |
| 8  | Iran-Azeri            | 100   | [50]          | 51 | Lebanon-B          | 191  | [18]        |
| 9  | Iran-Kurd             | 100   | [50]          | 52 | Lebanon-Armen      | 368  | [4]         |
| 10 | Tunisia-Berbers Zw    | 70    | [2]           | 53 | Lebanon-KZ         | 93   | [15]        |
| 11 | Tunisia               | 376   | [33]          | 54 | Lebanon-NS         | 59   | [15]        |
| 12 | Tunisia-A             | 80    | [32]          | 55 | Lebanese-Y         | 75   | [15]        |
| 13 | Iran-Khuzestani       | 50    | [42]          | 56 | Palestinians       | 165  | [6]         |
| 14 | Pakistan-Pathan       | 100   | [51]          | 57 | India-Delhi        | 112  | [53]        |
| 15 | Pakistan-Sindh        | 101   | [51]          | 58 | Saudi Arabia       | 105  | [5]         |
| 16 | Tunisia-south         | 250   | [34]          | 59 | Saudi Arabia-A     | 213  | [1]         |
| 17 | Libya                 | 118   | [8]           | 60 | Saudi Arabia-B     | 158  | [23]        |
| 18 | Libya-Jews            | 119   | [12]          | 61 | Saudi Arabia-C     | 499  | [1]         |
| 19 | Berbers-Metelsa       | 99    | [35]          | 62 | Saudi Arabia-D     | 383  | [24]        |
| 20 | Morocco               | 96    | [3]           | 63 | Oman               | 259  | [7] [25]    |
| 21 | Morocco-A             | 110   | [17]          | 64 | Kuwait             | 212  | [26]        |
| 22 | Morocco-Agadir        | 98    | [13]          | 65 | Kuwait-A           | 114  | [27]        |
| 23 | Morocco-Chaouya       | 98    | [36]          | 66 | Bahrain            | 72   | [11]        |
| 24 | Morocco-Jews          | 94    | [37]          | 67 | Emirates           | 373  | [1]         |
| 25 | Egypt                 | 101   | [15]          | 68 | Iraq- Kurds        | 209  | [28]        |
| 26 | Egypt-A               | 121   | [14]          | 69 | Yemen-Jews         | 76   | [12]        |
| 27 | Sudan                 | 200   | [1]           | 70 | Yemen-sana'a       | 50   | [29]        |
| 28 | Greece-Creta          | 135   | [40]          | 71 | Mali-Mossi         | 42   | [15]        |
| 29 | Spain-Spaniards       | 176   | [16]          | 72 | Senegal-Mandenka   | 200  | [15]        |
| 30 | Portugal              | 118   | [15]          | 73 | Guinea-Bubi        | 101  | [15]        |
| 31 | Spain-Murcia          | 173   | [49]          | 74 | Mali-Rimaibe       | 39   | [15]        |
| 32 | Italy                 | 284   | [38]          | 75 | Mali-Fulani        | 38   | [15]        |
| 33 | Spain-Basques-A       | 82    | [16]          | 76 | Macedonia          | 172  | [47]        |
| 34 | Spain-Basques-Arratia | 83    | [46]          | 77 | Turkey             | 250  | [1]         |
| 35 | Spain-Basques-B       | 99    | [41]          | 78 | Turkey-A           | 228  | [48]        |
| 36 | France                | 179   | [38]          | 79 | Albania            | 160  | [45]        |
| 37 | France-Rennes         | 200   | [10]          | 80 | Iran               | 120  | [43]        |
| 38 | Italy-Sardinia        | 91    | [38]          | 81 | Iran-A             | 100  | [44]        |
| 39 | Ashkenazi-Jews        | 132   | [37]          | 82 | Iran-Jews          | 91   | [42]        |
| 40 | Greece-C              | 98    | [15]          | 83 | Iran-Famoori Arabs | 84   | [42]        |
| 41 | Bangladesh            | 141   | [1]           | 84 | India-Northeast    | 188  | [52]        |
| 42 | Thailand              | 16807 | [1]           | 85 | Indonesia          | 236  | [1]         |
| 43 | Sri Lanka             | 714   | [1]           |    |                    |      |             |

\*population references are given in Supplementary file

## Population references

1. Database of allele frequencies: <http://www.allelefrequencys.net>, 2019
2. Hajjej A, Sellami MH, Kaabi H, Hajjej G, El-Gaaied A, Boukef K, et al. HLA class I and class II polymorphisms in Tunisian Berbers. *Annals of Human Biology*. 2011; 38(2):156-64. <https://doi.org/10.3109/03014460.2010.504195> PMID: 20666704
3. Gomez-Casado E, del Moral P, Martinez-Laso J, García-Gómez A, Allende L, Silvera-Redondo C, et al. HLA gene in Arabic-Speaking Moroccans: close relatedness to Berbers and Iberians. *Tissue Antigens*. 2000; 55(3): 239-49. <https://doi.org/10.1034/j.1399-0039.2000.550307.x> PMID: 10777099
4. Matevosyan L, Chattopadhyay S, Madelian V, Avagyan S, Nazaretyan M, Hyussian A, Vardapetyan E, Arutunyan R, Jordan F. .HLA-A, HLA-B, and HLA-DRB1 allele distribution in a large Armenian population sample. *Tissue Antigens*. 2011; 78(1): 21-30. <https://doi.org/10.1111/j.1399-0039.2011.01668.x> PMID: 21501120
5. Hamdi NM, Al-Hababi FH, Eid AE. HLA class I and class II associations with ESRD in Saudi Arabian population. *PLoS One*. 2014 Nov 7; 9(11): e111403. <https://doi.org/10.1371/journal.pone.0111403> PMD: 25380295
6. Arnaiz-Villena A, Elaiwa N, Silvera C, Rostom A, Moscoso J, Gómez-Casado E, et al. The origin of Palestinians and their genetic relatedness with other Mediterranean populations. Retraction in: Suciu-Foca N, Lewis R. *Human Immunology*. 2001; 62(9): 889-900. (Accessed on [https://commons.wikimedia.org/wiki/File:Palestinians\\_hla.pdf](https://commons.wikimedia.org/wiki/File:Palestinians_hla.pdf))
7. Albalushi KR, Sellami MH, Alriyami H, varghese M, Boukef MK, Hmida S. The Investigation of the Evolutionary History of the Omani Population by Analysis of HLA Class I Polymorphism. *Anthropologist*. 2014; 18(1): 205-210
8. Galgani A, Mancino G, Martínez-Labarga C, Cicconi R, Mattei M, Amicosante M, et al. HLA-A, -B and -DRB1 allele frequencies in Cyrenaica population (Libya) and genetic

- relationships with other populations. *Hum Immunol.* 2013; 74(1): 52-9.  
<https://doi.org/10.1016/j.humimm.2012.10.001> PMID: 23079236
9. Hajjej A, Hmida S, Kaabi H, Dridi A, Jridi A, El Gaaled A, et al. HLA genes in Southern Tunisians (Ghannouch area) and their relationship with other Mediterraneans. *European Journal Medical Genetics.* 2006; 49(1): 43-56.  
<https://doi.org/10.1016/j.ejmg.2005.01.001>. PMID: 16473309
  10. Hmida S, Gauthier A, Dridi A, Quillivic F, Genetet B, Boukef K, et al. HLA class II gene polymorphism in Tunisians. *Tissue Antigens.* 1995; 45(1): 63-8.  
<https://doi.org/10.1111/j.1399-0039.1995.tb02416.x> PMID: 7725313
  11. Almawi WY, Busson M, Tamim H, Al-Harbi EM, Finan RR, Wakim-Ghorayeb SF, et al. HLA class II profile and distribution of HLA-DRB1 and HLA-DQB1 alleles and haplotypes among Lebanese and Bahraini Arabs. *Clinical and Diagnostic Laboratory Immunology.* 2004; 11(4): 770-4. <https://doi.org/10.1128/CDLI.11.4.770-774.2004> PMID: 15242955
  12. Amar A, Kwon OJ, Motro U, Witt CS, Bonne-Tamir B, Gabison R, et al. Molecular analysis of HLA class II polymorphisms among different ethnic groups in Israel. *Human Immunology.* 1999; 60(8): 723-30. [https://doi.org/10.1016/S0198-8859\(99\)00043-9](https://doi.org/10.1016/S0198-8859(99)00043-9) PMID: 10439318
  13. Izaabel H, Garchon HJ, Caillat-Zucman S, Beaurain G, Akhayat O, Bach JF, et al. HLA class II DNA polymorphism in a Moroccan population from the Souss, Agadir area. *Tissue Antigens.* 1998; 51(1): 106-10. <https://doi.org/10.1111/j.1399-0039.1998.tb02954.x> PMID: 9459511
  14. Al-Tonbary Y, Abdel-Razek N, Zaghloul H, Metwaly S, El-Deek B, El-Shawaf R. HLA class II polymorphism in Egyptian children with lymphomas. *Hematology.* 2004; 9(2):139-45. <https://doi.org/10.1080/1024533042000205487> PMID: 15203870

15. Clayton J, Lonjou C. Allele and Haplotype frequencies for HLA loci in various ethnic groups. In Charron D, ed. Genetic diversity of HLA. Functional and medical implications. Vol 1. Paris: EDK. 1997; 665-820.
16. Martinez-Laso J, De Juan D, Martinez-Quiles N, Gomez-Casado E, Cuadrado E, Arnaiz-Villena A. The contribution of the HLA-A, -B, -C and -DR, -DQ DNA typing to the study of the origins of Spaniards and Basques. *Tissue Antigens*. 1995; 45(4): 237-45. <https://doi.org/10.1111/j.1399-0039.1995.tb02446.x> PMID: 7638859.
17. Brick C, Bennani N, Atouf O, Essakalli M. HLA-A, -B, -DR and -DQ allele and haplotype frequencies in the Moroccan population: a general population study.
18. Samaha H, Rahal EA, Abou-Jaoude M, Younes M, Dacchache J, Hakime N. HLA class II allele frequencies in the Lebanese population. *Molecular Immunology*. 2003; 39(17-18): 1079-81. [https://doi.org/10.1016/S0161-5890\(03\)00073-7](https://doi.org/10.1016/S0161-5890(03)00073-7) PMID: 12835080
19. Khansa S, Hoteit R, Shammaa D, Khalek RA, El Halas H, Greige L, et al. HLA class II allele frequencies in the Lebanese population. *Gene*. 2012; 506(2): 396-9. <https://doi.org/10.1016/j.gene.2012.06.063> PMID: 22750800
20. Elbjairami WM, Abdel-Rahman F, Hussein AA. Probability of finding an HLA-matched donor in immediate and extended families: the Jordanian experience. *Biology of Blood and Marrow Transplantation*. 2013; 19(2): 221-6. <https://doi.org/10.1016/j.bbmt.2012.09.009> PMID: 23025986
21. Mourad J, Monem F. HLA-DRB1 allele association with rheumatoid arthritis susceptibility and severity in Syria. *Revista Brasileira De Reumatologia*. 2013; 53(1): 47-56. PMID: 23588515
22. Djidjik R, Allam I, Douaoui S, Meddour Y, Cherguelaïne K, Tahiat A, et al. Association study of human leukocyte antigen-DRB1 alleles with rheumatoid arthritis in

- Algerian patients. *International Journal of Rheumatic Diseases*. 2014; <https://doi.org/10.1111/1756-185X.12272> PMID: 24447879
23. Hajeer AH, Al Balwi MA, AytülUyar F, Alhaidan Y, Alabdulrahman A, Al Abdulkareem I, Al Jumah M. HLA-A, -B, -C, -DRB1 and -DQB1 allele and haplotype frequencies in Saudis using next generation sequencing technique. *Tissue Antigens*. 2013; 82(4): 252-8. <https://doi.org/10.1111/tan.12200> PMID: 24461004
  24. Hajeer AH, Sawidan FA, Bohlega S, Saleh S, Sutton P, Shubaili A, Tahan AA, Al Jumah M. HLA class I and class II polymorphisms in Saudi patients with myasthenia gravis. *International Journal of Immunogenetics*. 2009; 36(3): 169-72. <https://doi.org/10.1111/j.1744-313X.2009.00843.x> PMID: 19490212
  25. Albalushi KR, Sellami MH, Alriyami H, varghese M, Boukef MK, Hmida S. HLA Class II (DRB1 and DQB1) Polymorphism in Omanis. *Journal of Transplantation Technologies and Research* 2014; 4: 134. <https://doi.org/10.4172/2161-0991.1000134>
  26. Haider MZ, Shaltout A, Alsaeid K, Qabazard M, Dorman J. Prevalence of human leukocyte antigen DQA1 and DQB1 alleles in Kuwaiti Arab children with type 1 diabetes mellitus. *Clinical Genetics*. 1999; 56(6): 450-6. <https://doi.org/10.1034/j.1399-0004.1999.560608.x> PMID: 10665665
  27. Haider MZ, Zahid MA, Dalal HN, Razik MA. Human leukocyte antigen (HLA) DRB1 alleles in Kuwaiti Arabs with schizophrenia. *American Journal of Medical Genetics*. 2000; 96(6): 870-2. [https://doi.org/10.1002/1096-8628\(20001204\)96:6<870::AID-AJMG36>3.0.CO;2-L](https://doi.org/10.1002/1096-8628(20001204)96:6<870::AID-AJMG36>3.0.CO;2-L) PMID: 11121200.
  28. Arnaiz-Villena A, Palacio-Grüber J, Muñoz E, Campos C, Alonso-Rubio J, Gomez-Casado E, Salih SF, Martin-Villa M, Al-Qadi R. Genetic HLA Study of Kurds in Iraq, Iran and Tbilisi (Caucasus, Georgia): Relatedness and Medical Implications. *PLoS One*.

2017 Jan 23; 12(1): e0169929. <https://doi.org/10.1371/journal.pone.0169929> PMID: 28114347

29. Nassar MY, Al-Shamahy HA, Masood HA. . The Association between Human Leukocyte Antigens and Hypertensive End-Stage Renal Failure among Yemeni Patients. Sultan Qaboos University Medical Journal. 2015; 15(2): e241–249. PMID: 26052458
30. Jazairi B, Khansaa I, Ikhtiar A, Murad H. Frequency of HLA-DRB1 and HLA-DQB1 Alleles and Haplotype Association in Syrian Population. Immunological Investigation. 2016; 45(2): 172-9. <https://doi.org/10.3109/08820139.2015.1131293> PMID: 26853713
31. Hajjej A, Hajjej G, Almawi WY, Kaabi H, El-Gaaied A, Hmida S. HLA class I and class II polymorphism in a population from south-eastern Tunisia (Gabes Area). International Journal of Immunogenetics. 2011; 38(3): 191-9. <https://doi.org/10.1111/j.1744-313X.2011.01003.x>. PMID: 21385325
32. Hajjej A, Kâabi H, Sellami MH, Dridi A, Jeridi A, El borgi W, et al. The contribution of HLA class I and II alleles and haplotypes to the investigation of the evolutionary history of Tunisians. Tissue Antigens. 2006; 68(2):153-62. <https://doi.org/10.1111/j.1399-0039.2006.00622.x>. PMID: 16866885
33. Hajjej A, Almawi WY, Hattab L, El-Gaaied A, Hmida S. HLA Class I and Class II Alleles and Haplotypes Confirm the Berber Origin of the Present Day Tunisian Population. PLoS One. 2015; 10(8): e0136909. <https://doi.org/10.1371/journal.pone.0136909> PMID: 26317228
34. Hajjej A, Almawi WY, Hattab L, El-Gaaied A, Hmida S. The investigation of the origin of Southern Tunisians using HLA genes. Journal of Human Genetics. 2017; 62(3): 419-429. <https://doi.org/10.1038/jhg.2016.146> PMID: 27881842

35. Oumhani K, Canossi A, Piancatelli D, Di Rocco M, Del Beato T, Liberatore G, et al. Sequence-Based analysis of the HLA-DRB1 polymorphism in Metalsa Berber and Chaouya Arabic-speaking groups from Morocco. *Human Immunology*. 2002; 63(2): 129-38. [https://doi.org/10.1016/S0198-8859\(01\)00370-6](https://doi.org/10.1016/S0198-8859(01)00370-6) PMID: 11821160
36. Canossi A, Piancatelli D, Aureli A, Oumhani K, Ozzella G, Del Beato T, et al. Correlation between genetic HLA class I and II polymorphisms and anthropological aspects in the Chaouya population from Morocco (Arabic speaking). *Tissue Antigens*. 2010; 76(3): 177-193. <https://doi.org/10.1111/j.1399-0039.2010.01498.x> PMID: 20492599
37. Roitberg-Tambur A, Witt CS, Friedmann A, Safirman C, Sherman L, Battat S, Nelken D, Brautbar C. Comparative analysis of HLA polymorphism at the serologic and molecular level in Moroccan and Ashkenazi Jews. *Tissue Antigens*. 1995; 46(2): 104-110. <https://doi.org/10.1111/j.1399-0039.1995.tb02485.x> PMID: 7482502
38. Imanishi T, Akaza T, Kimura A, Tokunaga K, Gjobori T. Allele and haplotype frequencies for HLA and complement loci in various ethnic groups. In, eds. *HLA 1991*. VOL 1. Oxford: Oxford University Press. 1992; 1065-220.
39. Arnaiz-Villena A, Benmamar D, Alvarez M, Diaz-Campos N, Varela P, Gomez-Casado E, et al. HLA allele and haplotype frequencies in Algerians. Relatedness to Spaniards and Basques. *Human Immunology*. 1995 ;43(4): 259-68. [https://doi.org/10.1016/0198-8859\(95\)00024-X](https://doi.org/10.1016/0198-8859(95)00024-X) PMID: 7499173
40. Arnaiz-Villena A, Iliakis P, González-Hevilla M, Longás J, Gómez-Casado E, Sfyridaki K, et al. The origin of Cretan populations as determined by characterization of HLA alleles. *Tissue Antigens*. 1999; 53(3): 213-26. <https://doi.org/10.1034/j.1399-0039.1999.530301.x> PMID: 10203014

41. Comas D, Mateu E, Calafell F, Pérez-Lezaun A, Bosch E, Martínez-Arias R, et al. HLA class I and class II DNA typing and the origin of Basques. *Tissue Antigens*. 1998; 51(1): 30-40. <https://doi.org/10.1111/j.1399-0039.1998.tb02944.x> PMID: 9459501
42. Farjadian S, Ghaderi A. HLA class II genetic diversity in Arabs and Jews of Iran. *Iranian Journal of Immunology*. 2007; 4(2): 85-93. <https://doi.org/IJIV4i2A3> PMID: 17652848
43. Kollaee A, Ghaffarpor M, Ghlichnia HA, Ghaffari SH, Zamani M. The influence of the HLA-DRB1 and HLA-DQB1 allele heterogeneity on disease risk and severity in Iranian patients with multiple sclerosis. *International Journal of Immunogenetics*. 2012; 39(5): 414-22. <https://doi.org/10.1111/j.1744-313X.2012.01104.x> PMID: 22404765
44. Sayad A, Akbari MT, Pajouhi M, Mostafavi F, Zamani M. The influence of the HLA-DRB, HLA-DQB and polymorphic positions of the HLA-DR $\beta$ 1 and HLA-DQ $\beta$ 1 molecules on risk of Iranian type 1 diabetes mellitus patients. *International Journal of Immunogenetics*. 2012; 39(5): 429-36. <https://doi.org/10.1111/j.1744-313X.2012.01116.x> PMID: 22494469
45. Sulcebe G, Sanchez-Mazas A, Tiercy JM, Shyti E, Mone I, Ylli Z, et al. HLA allele and haplotype frequencies in the Albanian population and their relationship with the other European populations. *International Journal of Immunogenetics*. 2009; 36(6): 337-43. <https://doi.org/10.1111/j.1744-313X.2009.00868.x> PMID: 19703234
46. Sanchez-Velasco P, Gomez-Casado E, Martinez-Laso J, Moscoso J, Zamora J, Lowy E, et al. HLA alleles in isolated populations from North Spain: origin of the Basques and the ancient Iberians. *Tissue Antigens*. 2003; 61(5): 384-92. <https://doi.org/10.1034/j.1399-0039.2003.00041.x> PMID: 12753657
47. Arnaiz-Villena A, Dimitroski K, Pacho A, Moscoso J, Gómez-Casado E, Silvera-Redondo C, et al. HLA genes in Macedonians and the sub-Saharan origin of the Greeks.



- Tissue Antigens. 2001; 57(2): 118-27. <https://doi.org/10.1034/j.1399-0039.2001.057002118.x> PMID: 11260506
48. Arnaiz-Villena A, Karin M, Bendikuze N, Gomez-Casado E, Moscoso J, Silvera C, et al. HLA alleles and haplotypes in the Turkish population: relatedness to Kurds, Armenians and other Mediterraneans. Tissue Antigens. 2001; 57(4): 308-17. <https://doi.org/10.1034/j.1399-0039.2001.057004308.x> PMID: 11380939
  49. Muro M, Marín L, Torío A, Moya-Quiles MR, Minguela A, Rosique-Roman J, et al. HLA polymorphism in the Murcia population (Spain): in the cradle of the archaeologic Iberians. Human Immunology. 2001; 62(9): 910-21. [https://doi.org/10.1016/S0198-8859\(01\)00290-7](https://doi.org/10.1016/S0198-8859(01)00290-7) PMID: 11543893
  50. Farjadian S, Ghaderi A. HLA class II similarities in Iranian Kurds and Azeris. International Journal of Immunogenetics. 2007; 34(6): 457-63. <https://doi.org/10.1111/j.1744-313X.2007.00723.x> PMID: 18001303
  51. Mohyuddin A, Ayub Q, Khaliq S, Mansoor A, Mazhar K, Rehman S, et al. HLA polymorphism in six ethnic groups from Pakistan. Tissue Antigens. 2002; 59(6): 492-501. <https://doi.org/10.1034/j.1399-0039.2002.590606.x> PMID: 12445319
  52. Agrawal S, Srivastava SK, Borkar M, Chaudhuri TK. Genetic affinities of north and northeastern populations of India: inference from HLA-based study. Tissue Antigens. 2008; 72(2): 120-30. <https://doi.org/10.1111/j.1399-0039.2008.01083.x> PMID: 18721272
