# Supplementary material for: Analysis of the Origin of Emiratis as Inferred from a Family Study Based on HLA-A, -C, -B, -DRB1, and -DQB1 Genes
Source: MDPI journal article supplement (doi:10.3390/genes14061159), 2023-05-26
Supplement: s1 [file s1]

Table S2 Hardy-Weinberg equilibrium for HLA loci

| HLA Locus | Sample size | Allele group (N) | Observed heterozygotes | Expected heterozygotes | Chi-square | p-value |
|-----------|-------------|------------------|------------------------|------------------------|------------|---------|
| A         | 200         | 17               | 178                    | 178.85                 | 0.004      | 0.9496  |
| B         | 200         | 28               | 180                    | 181.69                 | 0.016      | 0.8993  |
| C         | 200         | 14               | 174                    | 175.64                 | 0.015      | 0.9025  |
| DRB1      | 200         | 13               | 169                    | 174.03                 | 0.145      | 0.7034  |
| DQB1      | 200         | 5                | 149                    | 148.51                 | 0.002      | 0.9643  |
