# Supplementary material for: Analysis of the Origin of Emiratis as Inferred from a Family Study Based on HLA-A, -C, -B, -DRB1, and -DQB1 Genes
Source: MDPI journal article supplement (doi:10.3390/genes14061159), 2023-05-26
Supplement: s1 [file s1]

Table S4 Ewens-Watterson homozygosity test of neutrality

| HLA Locus   | Observed F | Expected F | Normalized deviate of F (Fnd) | p-value |
|-------------|------------|------------|-------------------------------|---------|
| <i>A</i>    | 0.1058     | 0.2176     | -1.3629                       | 0.0064  |
| <i>B</i>    | 0.0916     | 0.1287     | -0.8502                       | 0.1536  |
| <i>C</i>    | 0.1218     | 0.2620     | -1.3993                       | 0.0030  |
| <i>DRB1</i> | 0.1299     | 0.2806     | -1.4191                       | 0.0051  |
| <i>DQB1</i> | 0.2574     | 0.5696     | -1.6801                       | 0.0064  |
