# Supplementary material for: Analysis of the Origin of Emiratis as Inferred from a Family Study Based on HLA-A, -C, -B, -DRB1, and -DQB1 Genes
Source: MDPI journal article supplement (doi:10.3390/genes14061159), 2023-05-26
Supplement: s1 [file s1]

Table S3 Complete list of HLA Class I and Class II two-Locus haplotypes in Emiratis

| HLA Haplotype | Frequency | SD*    | D'   | X <sup>2</sup> | <i>P-value</i> |
|---------------|-----------|--------|------|----------------|----------------|
| A-B           |           |        |      |                |                |
| A*02-B*51     | 0.0750    | 0.0132 | 0.21 | 14.72          | 0.0001         |
| A*26-B*08     | 0.0525    | 0.0112 | 0.53 | 85.26          | <E-5           |
| A*33-B*58     | 0.0250    | 0.0078 | 0.39 | 52.30          | <E-5           |
| A*03-B*50     | 0.0250    | 0.0078 | 0.25 | 24.31          | <E-5           |
| A*11-B*40     | 0.0250    | 0.0078 | 0.45 | 40.16          | <E-5           |
| A*32-B*35     | 0.0225    | 0.0074 | 0.19 | 7.22           | 0.0072         |
| A*24-B*08     | 0.0200    | 0.0070 | 0.16 | 6.76           | 0.0093         |
| A*33-B*14     | 0.0200    | 0.0070 | 0.40 | 42.55          | <E-5           |
| A*01-B*37     | 0.0150    | 0.0061 | 0.73 | 46.42          | <E-5           |
| A*03-B*52     | 0.0150    | 0.0061 | 0.38 | 23.95          | <E-5           |
| A*03-B*18     | 0.0100    | 0.0050 | 0.25 | 9.46           | 0.0021         |
| A*11-B*41     | 0.0100    | 0.0050 | 0.34 | 11.10          | 0.0009         |
| A*01-B*73     | 0.0075    | 0.0043 | 0.38 | 10.81          | 0.0010         |
| A*32-B*07     | 0.0075    | 0.0043 | 0.38 | 12.84          | 0.0003         |
| A*32-B*18     | 0.0075    | 0.0043 | 0.17 | 4.70           | 0.0302         |
| A*26-B*38     | 0.0075    | 0.0043 | 0.56 | 16.08          | 6.1 E-5        |
| A*23-B*50     | 0.0075    | 0.0043 | 0.24 | 6.41           | 0.0113         |
| A*30-B*42     | 0.0075    | 0.0043 | 0.58 | 28.94          | <E-5           |
| A*24-B*27     | 0.0050    | 0.0035 | 0.46 | 10.09          | 0.0015         |
| A*24-B*44     | 0.0050    | 0.0035 | 0.28 | 5.58           | 0.0182         |
| A*24-B*49     | 0.0050    | 0.0035 | 0.23 | 4.32           | 0.0377         |
| A*66-B*58     | 0.0050    | 0.0035 | 0.65 | 20.70          | <E-5           |
| A*30-B*45     | 0.0050    | 0.0035 | 0.47 | 15.39          | 8.7 E-5        |
| A*24-B*39     | 0.0025    | 0.0025 | 0.46 | 5.02           | 0.0251         |
| A*01-B*56     | 0.0025    | 0.0025 | 1.00 | 10.79          | 0.0010         |
| A*01-B*47     | 0.0025    | 0.0025 | 1.00 | 10.79          | 0.0010         |
| A*01-B*81     | 0.0025    | 0.0025 | 1.00 | 10.79          | 0.0010         |
| A*74-B*15     | 0.0025    | 0.0025 | 0.23 | 6.72           | 0.0095         |
| A*66-B*41     | 0.0025    | 0.0025 | 0.32 | 11.79          | 0.0006         |
| A*31-B*42     | 0.0025    | 0.0025 | 0.18 | 05.03          | 0.0249         |
| A*23-B*44     | 0.0025    | 0.0025 | 0.15 | 5.02           | 0.0251         |
| A*23-B*49     | 0.0025    | 0.0025 | 0.12 | 4.06           | 0.0439         |
| A*23-B*57     | 0.0025    | 0.0025 | 0.12 | 4.06           | 0.0439         |
| A*11-B*55     | 0.0025    | 0.0025 | 1.00 | 9.55           | 0.0020         |
| A*34-B*44     | 0.0025    | 0.0025 | 0.49 | 32.00          | <E-5           |
| A*34-B*15     | 0.0025    | 0.0025 | 0.48 | 15.26          | 9.4E-5         |
| A*30-B*53     | 0.0025    | 0.0025 | 0.18 | 4.95           | 0.0261         |

|              |        |        |      |        |         |
|--------------|--------|--------|------|--------|---------|
| A*30-B*13    | 0.0025 | 0.0025 | 0.29 | 4.51   | 0.0337  |
| A*30-B*39    | 0.0025 | 0.0025 | 0.47 | 7.66   | 0.0056  |
| A*29-B*53    | 0.0025 | 0.0025 | 0.49 | 20.84  | <E-5    |
| A*29-B*13    | 0.0025 | 0.0025 | 0.50 | 65.50  | <E-5    |
| A*69-B*52    | 0.0025 | 0.0025 | 1.00 | 27.64  | <E-5    |
| B-C          |        |        |      |        |         |
| B*35-C*04    | 0.1175 | 0.0161 | 0.83 | 238.26 | <E-5    |
| B*50-C*06    | 0.0800 | 0.0136 | 0.96 | 210.04 | <E-5    |
| B*51-C*15    | 0.0700 | 0.0128 | 0.43 | 44.92  | <E-5    |
| B*51-C*16    | 0.0525 | 0.0112 | 0.72 | 62.65  | <E-5    |
| B*14-C*08    | 0.0450 | 0.0104 | 1.00 | 400.00 | <E-5    |
| B*58-C*03    | 0.0450 | 0.0104 | 0.77 | 198.26 | <E-5    |
| B*40-C*15    | 0.0400 | 0.0098 | 0.77 | 83.56  | <E-5    |
| B*52-C*12    | 0.0325 | 0.0089 | 0.92 | 124.57 | <E-5    |
| B*51-C*14    | 0.0300 | 0.0085 | 1.00 | 51.07  | <E-5    |
| B*37-C*06    | 0.0200 | 0.0070 | 1.00 | 51.21  | <E-5    |
| B*73-C*15    | 0.0175 | 0.0066 | 1.00 | 47.68  | <E-5    |
| B*49-C*07    | 0.0175 | 0.0066 | 1.00 | 28.50  | <E-5    |
| B*18-C*12    | 0.0175 | 0.0066 | 0.49 | 33.00  | <E-5    |
| B*07-C*07    | 0.0150 | 0.0061 | 0.95 | 185.92 | <E-5    |
| B*41-C*17    | 0.0150 | 0.0061 | 0.59 | 125.70 | <E-5    |
| B*53-C*04    | 0.0150 | 0.0061 | 0.61 | 18.40  | 1.8E-5  |
| B*07-C*07    | 0.0150 | 0.0061 | 0.82 | 19.23  | 1.2E-5  |
| B*57-C*06    | 0.0125 | 0.0056 | 0.67 | 19.99  | <E-5    |
| B*38-C*12    | 0.0125 | 0.0056 | 1.00 | 51.20  | <E-5    |
| B*42-C*17    | 0.0125 | 0.0056 | 1.00 | 179.06 | <E-5    |
| B*15-C*02    | 0.0100 | 0.0050 | 0.31 | 39.12  | <E-5    |
| B*45-C*16    | 0.0100 | 0.0050 | 1.00 | 55.82  | <E-5    |
| B*15-C*03    | 0.0075 | 0.0043 | 0.20 | 6.55   | 0.0105  |
| B*27-C*01    | 0.0050 | 0.0035 | 0.49 | 77.79  | <E-5    |
| B*27-C*02    | 0.0050 | 0.0035 | 0.48 | 30.67  | <E-5    |
| B*44-C*16    | 0.0050 | 0.0035 | 0.29 | 6.84   | 0.0089  |
| B*13-C*06    | 0.0050 | 0.0035 | 0.61 | 7.14   | 0.0075  |
| B*39-C*12    | 0.0050 | 0.0035 | 1.00 | 20.32  | <E-5    |
| B*56-C*01    | 0.0025 | 0.0025 | 1.00 | 79.20  | <E-5    |
| B*47-C*04    | 0.0025 | 0.0025 | 1.00 | 5.47   | 0.0193  |
| B*15-C*05    | 0.0025 | 0.0025 | 0.48 | 15.26  | 9.4 E-5 |
| B*81-C*18    | 0.0025 | 0.0025 | 1.00 | 400.00 | <E-5    |
| B*55-C*01    | 0.0025 | 0.0025 | 1.00 | 79.20  | <E-5    |
| B-DRB1       |        |        |      |        |         |
| B*08-DRB1*03 | 0.0975 | 0.0148 | 0.80 | 117.49 | <E-5    |

|                 |        |        |      |        |         |
|-----------------|--------|--------|------|--------|---------|
| B*50-DRB1*07    | 0.0475 | 0.0106 | 0.51 | 64.97  | <E-5    |
| B*52-DRB1*15    | 0.0300 | 0.0085 | 0.84 | 95.14  | <E-5    |
| B*40-DRB1*16    | 0.0275 | 0.0082 | 0.45 | 20.01  | 0.00001 |
| B*58-DRB1*03    | 0.0250 | 0.0078 | 0.27 | 6.36   | 0.0117  |
| B*14-DRB1*01    | 0.0150 | 0.0061 | 0.30 | 36.43  | <E-5    |
| B*14-DRB1*07    | 0.0150 | 0.0061 | 0.24 | 7.18   | 0.0074  |
| B*18-DRB1*16    | 0.0150 | 0.0061 | 0.34 | 7.42   | 0.0064  |
| B*37-DRB1*10    | 0.0125 | 0.0056 | 0.61 | 78.06  | <E-5    |
| B*41-DRB1*08    | 0.0100 | 0.0050 | 0.43 | 66.45  | <E-5    |
| B*53-DRB1*04    | 0.0100 | 0.0050 | 0.38 | 11.70  | 0.0006  |
| B*49-DRB1*13    | 0.0100 | 0.0050 | 0.55 | 36.56  | <E-5    |
| B*15-DRB1*11    | 0.0100 | 0.0050 | 0.28 | 13.18  | 0.0003  |
| B*42-DRB1*03    | 0.0100 | 0.0050 | 0.74 | 9.76   | 0.0018  |
| B*51-DRB1*09    | 0.0075 | 0.0043 | 1.00 | 12.48  | 4.1E-4  |
| B*73-DRB1*01    | 0.0075 | 0.0043 | 0.40 | 24.39  | <E-5    |
| B*44-DRB1*11    | 0.0075 | 0.0043 | 0.46 | 17.30  | 3 E-5   |
| B*57-DRB1*07    | 0.0075 | 0.0043 | 0.34 | 5.80   | 0.0160  |
| B*07-DRB1*15    | 0.0075 | 0.0043 | 0.37 | 8.87   | 0.0029  |
| B*27-DRB1*08    | 0.0050 | 0.0035 | 0.49 | 41.89  | <E-5    |
| B*45-DRB1*13    | 0.0050 | 0.0035 | 0.47 | 15.40  | 0.0001  |
| B*56-DRB1*04    | 0.0025 | 0.0025 | 1.00 | 8.78   | 0.0030  |
| B*47-DRB1*13    | 0.0025 | 0.0025 | 1.00 | 17.22  | 3 E-5   |
| B*13-DRB1*14    | 0.0025 | 0.0025 | 0.32 | 13.28  | 0.0003  |
| B*39-DRB1*13    | 0.0025 | 0.0025 | 0.47 | 7.66   | 0.0056  |
| B*42-DRB1*12    | 0.0025 | 0.0025 | 0.19 | 14.42  | 15E-5   |
| B*55-DRB1*16    | 0.0025 | 0.0025 | 1.00 | 4.64   | 0.0311  |
| DRB1-DQB1       |        |        |      |        |         |
| DRB1*03-DQB1*02 | 0.2125 | 0.0205 | 0.93 | 204.69 | <E-5    |
| DRB1*16-DQB1*05 | 0.1725 | 0.0189 | 0.96 | 187.82 | <E-5    |
| DRB1*07-DQB1*02 | 0.1100 | 0.0157 | 0.79 | 76.03  | <E-5    |
| DRB1*04-DQB1*03 | 0.0875 | 0.0141 | 0.82 | 119.94 | <E-5    |
| DRB1*15-DQB1*06 | 0.0850 | 0.0140 | 0.85 | 192.21 | <E-5    |
| DRB1*11-DQB1*03 | 0.0650 | 0.0123 | 0.91 | 98.28  | <E-5    |
| DRB1*13-DQB1*06 | 0.0475 | 0.0106 | 0.84 | 101.25 | <E-5    |
| DRB1*01-DQB1*05 | 0.0450 | 0.0104 | 1.00 | 44.51  | <E-5    |
| DRB1*10-DQB1*05 | 0.0375 | 0.0095 | 1.00 | 36.80  | <E-5    |
| DRB1*14-DQB1*05 | 0.0225 | 0.0074 | 1.00 | 21.74  | <E-5    |
| DRB1*08-DQB1*04 | 0.0125 | 0.0056 | 0.54 | 80.11  | <E-5    |
| DRB1*04-DQB1*04 | 0.0100 | 0.0050 | 0.22 | 6.15   | 0.0131  |
| DRB1*12-DQB1*03 | 0.0100 | 0.0050 | 0.75 | 11.19  | 0.0008  |
| DRB1*09-DQB1*03 | 0.0075 | 0.0043 | 1.00 | 11.90  | 0.0006  |
